## Kinesins at a glance

Sharyn A. Endow, F. Jon Kull and Honglei Liu

*Journal of Cell Science* 123, 4000  
© 2010. Published by The Company of Biologists Ltd  
doi:10.1242/jcs.082667/doi:10.

There was an error published in *J. Cell Sci.* **123**, 3420-3423.

We misprinted the sentence in the acknowledgements that states the American Heart Association (AHA) as the funding body supporting F. Jon Kull.

The correct sentence is given below:

The authors' research on kinesins is supported by NIH GM046225 and March of Dimes 1-FY07-443 Grants to S.A.E., and AHA Scientist Development Grant 0330345N to F.J.K.

We apologise for this mistake.
